# Supplementary material for: cDNA Transcriptome of Arabidopsis Reveals Various Defense Priming Induced by a Broad-Spectrum Biocontrol Agent Burkholderia sp. SSG
Source: MDPI journal article supplement (doi:10.3390/ijms23063151), 2022-03-15
Supplement: s1 [file s1]

|                          |                                  |                               |                               |                                         |                                   |                                   |
|--------------------------|----------------------------------|-------------------------------|-------------------------------|-----------------------------------------|-----------------------------------|-----------------------------------|
| response to wounding     | response to oxidative stress     | response to fungus            | response to biotic stimulus   | secondary metabolic process             | sulfur compound metabolic process | small molecule metabolic process  |
| cold acclimation         | response to endogenous stimulus  | response to external stimulus | response to abiotic stimulus  | catabolic process                       | cellular metabolic process        | S-glycoside metabolic process     |
| response to carbohydrate | response to jasmonic acid        | response to stress            | response to salt stress       | secondary metabolic process             |                                   |                                   |
| response to hexose       | response to temperature stimulus | response to osmotic stress    | response to light stimulus    | cellular amine metabolic process        | carbohydrate catabolic process    | cellular ketone metabolic process |
|                          |                                  |                               |                               | cellular carbohydrate metabolic process | cellular catabolic process        | small molecule catabolic process  |
| response to chemical     | response to cold                 | response to radiation         | response to organic substance |                                         |                                   | carboxylic acid metabolic process |
|                          |                                  |                               | response to water deprivation | cellular process                        | regulation of biological quality  | response to stimulus              |
