# Supplementary material for: cDNA Transcriptome of Arabidopsis Reveals Various Defense Priming Induced by a Broad-Spectrum Biocontrol Agent Burkholderia sp. SSG
Source: MDPI journal article supplement (doi:10.3390/ijms23063151), 2022-03-15
Supplement: s1 [file s1]

6 hpt

## Functional Categorization by annotation for : GO Biological Process

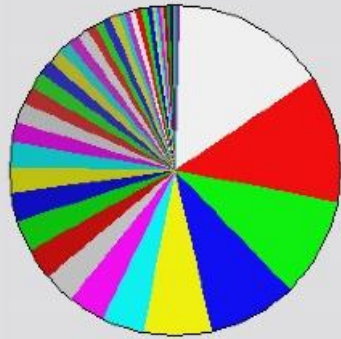

|                                                                             |
|-----------------------------------------------------------------------------|
| other cellular processes: 15.595% ( raw value = 194 )                       |
| response to stress: 12.46% ( raw value = 155 )                              |
| response to chemical: 9.646% ( raw value = 120 )                            |
| other metabolic processes: 8.521% ( raw value = 106 )                       |
| response to abiotic stimulus: 6.752% ( raw value = 84 )                     |
| anatomical structure development: 4.26% ( raw value = 53 )                  |
| multicellular organism development: 3.698% ( raw value = 46 )               |
| response to external stimulus: 3.055% ( raw value = 38 )                    |
| biosynthetic process: 2.974% ( raw value = 37 )                             |
| response to endogenous stimulus: 2.974% ( raw value = 37 )                  |
| cellular component organization: 2.653% ( raw value = 33 )                  |
| response to biotic stimulus: 2.572% ( raw value = 32 )                      |
| reproduction: 2.492% ( raw value = 31 )                                     |
| transport: 2.01% ( raw value = 25 )                                         |
| signal transduction: 1.929% ( raw value = 24 )                              |
| catabolic process: 1.768% ( raw value = 22 )                                |
| nucleobase-containing compound metabolic process: 1.688% ( raw value = 21 ) |
| post-embryonic development: 1.367% ( raw value = 17 )                       |
| other biological processes: 1.367% ( raw value = 17 )                       |
| growth: 1.125% ( raw value = 14 )                                           |
| response to light stimulus: 1.045% ( raw value = 13 )                       |
| cell differentiation: 1.045% ( raw value = 13 )                             |
| embryo development: 0.884% ( raw value = 11 )                               |
| carbohydrate metabolic process: 0.723% ( raw value = 9 )                    |
| cell growth: 0.723% ( raw value = 9 )                                       |
| cellular protein modification process: 0.723% ( raw value = 9 )             |
| secondary metabolic process: 0.643% ( raw value = 8 )                       |
| lipid metabolic process: 0.643% ( raw value = 8 )                           |
| pollination: 0.563% ( raw value = 7 )                                       |
| protein metabolic process: 0.482% ( raw value = 6 )                         |
| unknown biological processes: 0.482% ( raw value = 6 )                      |
| cell communication: 0.482% ( raw value = 6 )                                |
| cellular homeostasis: 0.402% ( raw value = 5 )                              |
| translation: 0.322% ( raw value = 4 )                                       |
| photosynthesis: 0.322% ( raw value = 4 )                                    |
| flower development: 0.322% ( raw value = 4 )                                |
| cell cycle: 0.322% ( raw value = 4 )                                        |
| DNA metabolic process: 0.241% ( raw value = 3 )                             |
| generation of precursor metabolites and energy: 0.241% ( raw value = 3 )    |
| circadian rhythm: 0.161% ( raw value = 2 )                                  |
| tropism: 0.161% ( raw value = 2 )                                           |
| cell death: 0.161% ( raw value = 2 )                                        |

24 hpt

## Functional Categorization by annotation for : GO Biological Process

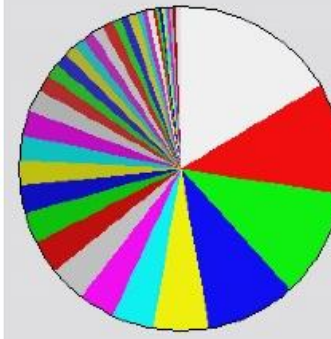

|                                                                             |
|-----------------------------------------------------------------------------|
| other cellular processes: 16.401% ( raw value = 185 )                       |
| response to stress: 11.082% ( raw value = 125 )                             |
| other metabolic processes: 10.816% ( raw value = 122 )                      |
| response to chemical: 8.954% ( raw value = 101 )                            |
| response to abiotic stimulus: 5.585% ( raw value = 63 )                     |
| biosynthetic process: 4.078% ( raw value = 46 )                             |
| response to external stimulus: 3.723% ( raw value = 42 )                    |
| response to endogenous stimulus: 3.546% ( raw value = 40 )                  |
| response to biotic stimulus: 3.28% ( raw value = 37 )                       |
| anatomical structure development: 2.926% ( raw value = 33 )                 |
| multicellular organism development: 2.66% ( raw value = 30 )                |
| cellular component organization: 2.571% ( raw value = 29 )                  |
| signal transduction: 2.571% ( raw value = 29 )                              |
| catabolic process: 2.482% ( raw value = 28 )                                |
| response to light stimulus: 2.305% ( raw value = 26 )                       |
| nucleobase-containing compound metabolic process: 1.773% ( raw value = 20 ) |
| cellular protein modification process: 1.418% ( raw value = 16 )            |
| secondary metabolic process: 1.33% ( raw value = 15 )                       |
| lipid metabolic process: 1.241% ( raw value = 14 )                          |
| reproduction: 1.241% ( raw value = 14 )                                     |
| carbohydrate metabolic process: 1.241% ( raw value = 14 )                   |
| post-embryonic development: 1.152% ( raw value = 13 )                       |
| transport: 1.064% ( raw value = 12 )                                        |
| other biological processes: 0.887% ( raw value = 10 )                       |
| protein metabolic process: 0.887% ( raw value = 10 )                        |
| growth: 0.798% ( raw value = 9 )                                            |
| cell communication: 0.621% ( raw value = 7 )                                |
| cell growth: 0.532% ( raw value = 6 )                                       |
| embryo development: 0.443% ( raw value = 5 )                                |
| cell differentiation: 0.355% ( raw value = 4 )                              |
| generation of precursor metabolites and energy: 0.355% ( raw value = 4 )    |
| DNA metabolic process: 0.266% ( raw value = 3 )                             |
| pollination: 0.266% ( raw value = 3 )                                       |
| unknown biological processes: 0.177% ( raw value = 2 )                      |
| cellular homeostasis: 0.177% ( raw value = 2 )                              |
| circadian rhythm: 0.177% ( raw value = 2 )                                  |
| cell death: 0.177% ( raw value = 2 )                                        |
| flower development: 0.089% ( raw value = 1 )                                |
| photosynthesis: 0.089% ( raw value = 1 )                                    |
| translation: 0.089% ( raw value = 1 )                                       |
| tropism: 0.089% ( raw value = 1 )                                           |
| regulation of gene expression, epigenetic: 0.089% ( raw value = 1 )         |
