# Supplementary material for: cDNA Transcriptome of Arabidopsis Reveals Various Defense Priming Induced by a Broad-Spectrum Biocontrol Agent Burkholderia sp. SSG
Source: MDPI journal article supplement (doi:10.3390/ijms23063151), 2022-03-15
Supplement: s1 [file s1]

6 hpt

Functional Categorization by annotation for : GO Cellular Component

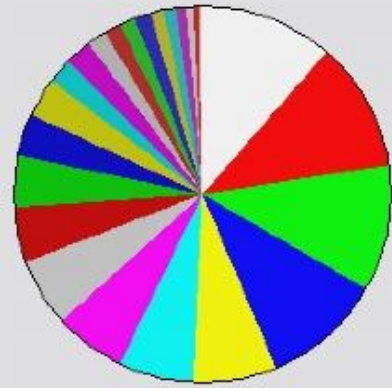

|  |                                                           |
|--|-----------------------------------------------------------|
|  | chloroplast: 11.325% ( raw value = 53 )                   |
|  | cytoplasm: 11.111% ( raw value = 52 )                     |
|  | nucleus: 10.897% ( raw value = 51 )                       |
|  | cytosol: 10.256% ( raw value = 48 )                       |
|  | plastid: 7.265% ( raw value = 34 )                        |
|  | other membranes: 6.41% ( raw value = 30 )                 |
|  | other intracellular components: 6.197% ( raw value = 29 ) |
|  | plasma membrane: 5.769% ( raw value = 27 )                |
|  | mitochondrion: 4.701% ( raw value = 22 )                  |
|  | extracellular region: 4.487% ( raw value = 21 )           |
|  | vacuole: 3.632% ( raw value = 17 )                        |
|  | other cellular components: 3.419% ( raw value = 16 )      |
|  | thylakoid: 2.35% ( raw value = 11 )                       |
|  | Golgi apparatus: 2.137% ( raw value = 10 )                |
|  | endoplasmic reticulum: 1.709% ( raw value = 8 )           |
|  | ribosome: 1.496% ( raw value = 7 )                        |
|  | cell wall: 1.496% ( raw value = 7 )                       |
|  | peroxisome: 1.282% ( raw value = 6 )                      |
|  | nucleolus: 1.068% ( raw value = 5 )                       |
|  | endosome: 1.068% ( raw value = 5 )                        |
|  | cytoskeleton: 0.855% ( raw value = 4 )                    |
|  | unknown cellular components: 0.641% ( raw value = 3 )     |
|  | nucleoplasm: 0.427% ( raw value = 2 )                     |

24 hpt

Functional Categorization by annotation for : GO Cellular Component

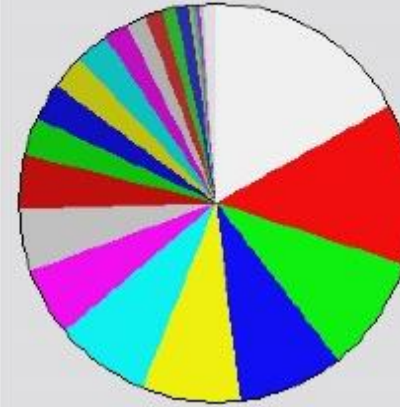

|  |                                                           |
|--|-----------------------------------------------------------|
|  | chloroplast: 16.84% ( raw value = 81 )                    |
|  | plastid: 13.098% ( raw value = 63 )                       |
|  | other intracellular components: 9.563% ( raw value = 46 ) |
|  | cytosol: 8.732% ( raw value = 42 )                        |
|  | cytoplasm: 8.108% ( raw value = 39 )                      |
|  | nucleus: 7.9% ( raw value = 38 )                          |
|  | extracellular region: 5.613% ( raw value = 27 )           |
|  | plasma membrane: 4.99% ( raw value = 24 )                 |
|  | other membranes: 4.574% ( raw value = 22 )                |
|  | mitochondrion: 3.119% ( raw value = 15 )                  |
|  | vacuole: 3.119% ( raw value = 15 )                        |
|  | other cellular components: 2.911% ( raw value = 14 )      |
|  | Golgi apparatus: 2.911% ( raw value = 14 )                |
|  | thylakoid: 1.871% ( raw value = 9 )                       |
|  | endoplasmic reticulum: 1.663% ( raw value = 8 )           |
|  | cell wall: 1.455% ( raw value = 7 )                       |
|  | peroxisome: 1.247% ( raw value = 6 )                      |
|  | unknown cellular components: 1.04% ( raw value = 5 )      |
|  | endosome: 0.416% ( raw value = 2 )                        |
|  | ribosome: 0.416% ( raw value = 2 )                        |
|  | nucleoplasm: 0.208% ( raw value = 1 )                     |
|  | nuclear envelope: 0.208% ( raw value = 1 )                |
