# Supplementary material for: cDNA Transcriptome of Arabidopsis Reveals Various Defense Priming Induced by a Broad-Spectrum Biocontrol Agent Burkholderia sp. SSG
Source: MDPI journal article supplement (doi:10.3390/ijms23063151), 2022-03-15
Supplement: s1 [file s1]

|                                   |                                              |                                          |                                             |                                                |                                                        |                                              |                                           |                                              |                                  |                                                |
|-----------------------------------|----------------------------------------------|------------------------------------------|---------------------------------------------|------------------------------------------------|--------------------------------------------------------|----------------------------------------------|-------------------------------------------|----------------------------------------------|----------------------------------|------------------------------------------------|
| response to karrikin              | response to mycotoxin                        | response to microbial phytotoxin         | response to freezing                        | amine metabolic process                        | indole-containing compound metabolic process           | heterocycle catabolic process                | cellular biogenic amine metabolic process | regulation of immune system process          | regulation of stomatal movement  | regulation of response to stimulus             |
| systemic acquired resistance      | response to bacterium                        | hyperosmotic response                    | cellular response to sucrose starvation     | cellular modified amino acid metabolic process | peptide process                                        | indole-containing compound metabolic process | heterocycle biosynthetic process          | positive regulation of biological process    | positive regulation of signaling | regulation of response to red or far red light |
| response to sucrose               | hyperosmotic salinity response               | response to red or far red light         | innate immune response                      | cellular response to stimulus                  | cellular modified amino acid catabolic process         | aromatic compound catabolic process          | cellular biosynthetic process             | aromatic amino acid family catabolic process | regulation of hormone levels     | positive regulation of cell communication      |
| response to toxic substance       | defense response                             | cellular response to abiotic stimulus    | cellular response to hormone stimulus       | jasmonic acid mediated signaling pathway       | vitamin metabolic process                              | oxylipin metabolic process                   | glycine metabolic process                 | proximal/distal pattern formation            | abscission                       | glycoside metabolic process                    |
| response to UV-B                  | defense response to bacterium                | cellular response to chemical stimulus   | signal transduction                         | leucine metabolic process                      | serine family amino acid metabolic process             | aromatic amino acid family metabolic process | proximal/distal pattern formation         | floral organ abscission                      | syncytium formation              | glycoside biosynthetic process                 |
| oligosaccharide metabolic process | carbohydrate metabolic process               | primary metabolic process                | oligosaccharide catabolic process           | branched-chain amino acid metabolic process    | small molecule biosynthetic process                    | cellular amino acid metabolic process        | toxin metabolic process                   | metabolic process                            | signaling                        |                                                |
| biosynthetic process              | heterocycle metabolic process                | cellular lipid metabolic process         | carbohydrate biosynthetic process           | oxylipin biosynthetic process                  | nucleobase-containing small molecule metabolic process |                                              | biological regulation                     | stomatal movement                            | pigment metabolic process        | flavonoid metabolic process                    |
| raffinose catabolic process       | cellular aromatic compound metabolic process | carbohydrate biosynthetic process        | jasmonic acid metabolic process             | jasmonic acid biosynthetic process             | plant-type cell wall loosening                         | chromatin remodeling at                      | immune system process                     | protein targeting to membrane                | pigment biosynthetic process     |                                                |
| lipid metabolic process           | cellular nitrogen compound metabolic process | unsaturated fatty acid metabolic process | unsaturated fatty acid biosynthetic process | protein polymerization                         | pericentric heterochromatin assembly                   |                                              |                                           |                                              |                                  |                                                |
