# Supplementary material for: cDNA Transcriptome of Arabidopsis Reveals Various Defense Priming Induced by a Broad-Spectrum Biocontrol Agent Burkholderia sp. SSG
Source: MDPI journal article supplement (doi:10.3390/ijms23063151), 2022-03-15

AT5G17920 : p\_value=0

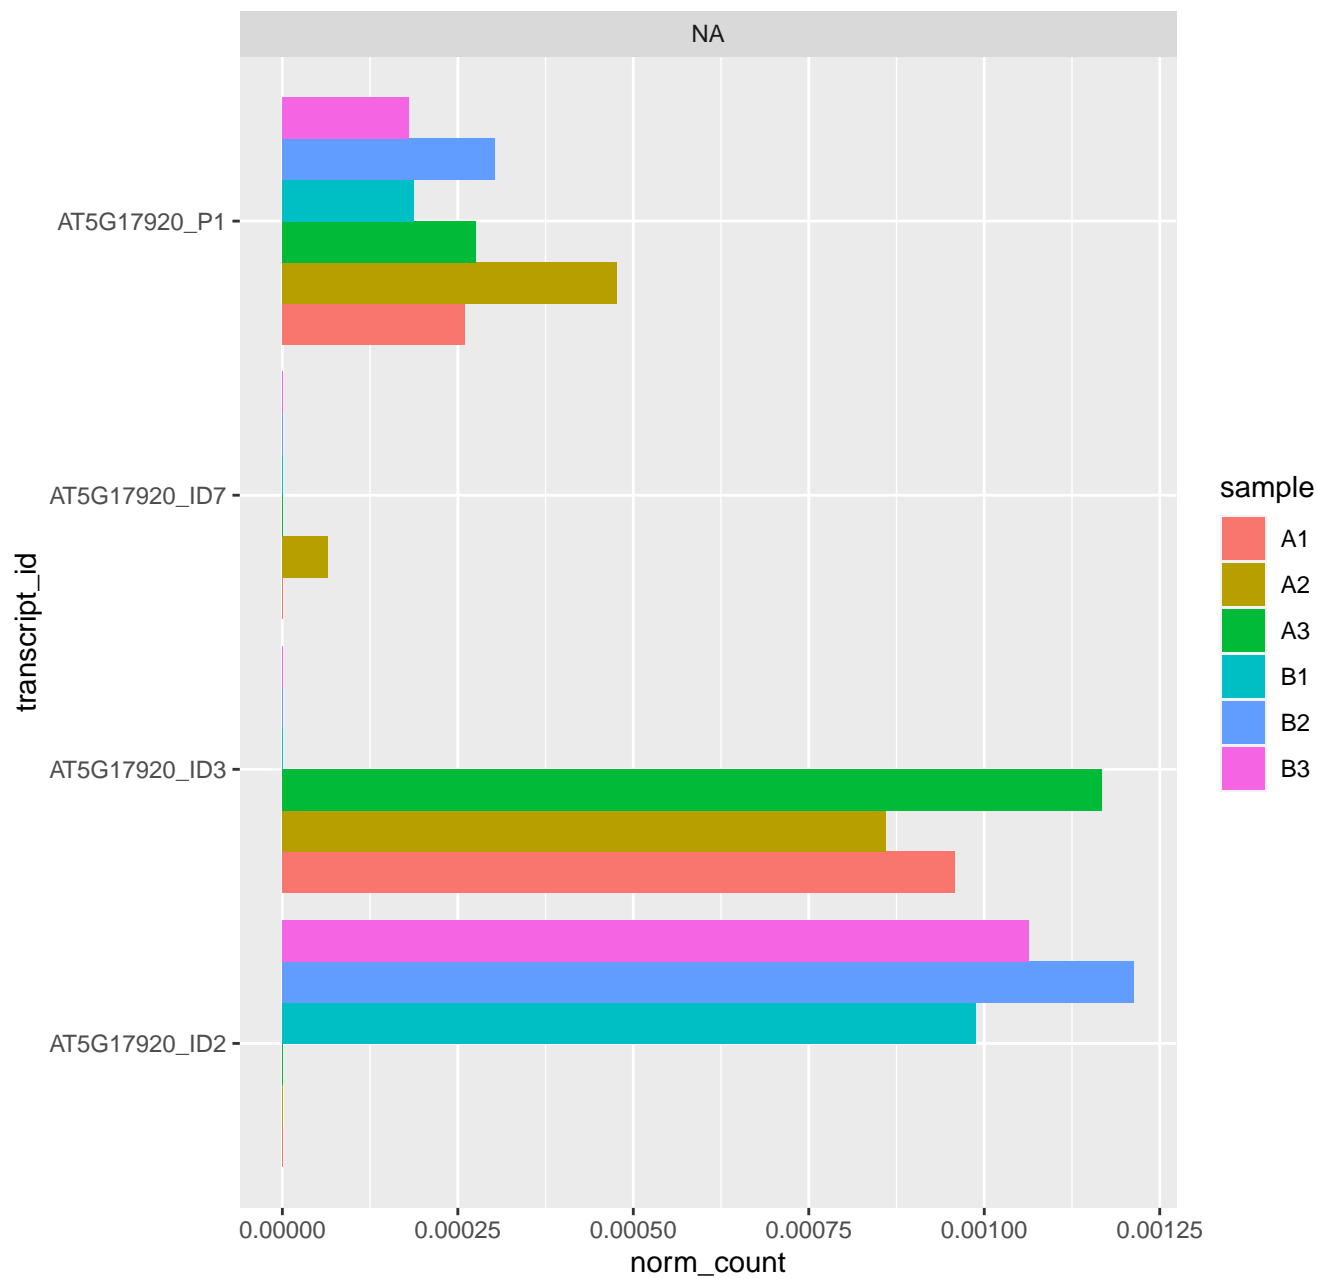

AT5G13740 : p\_value=5.32129895702838e-13

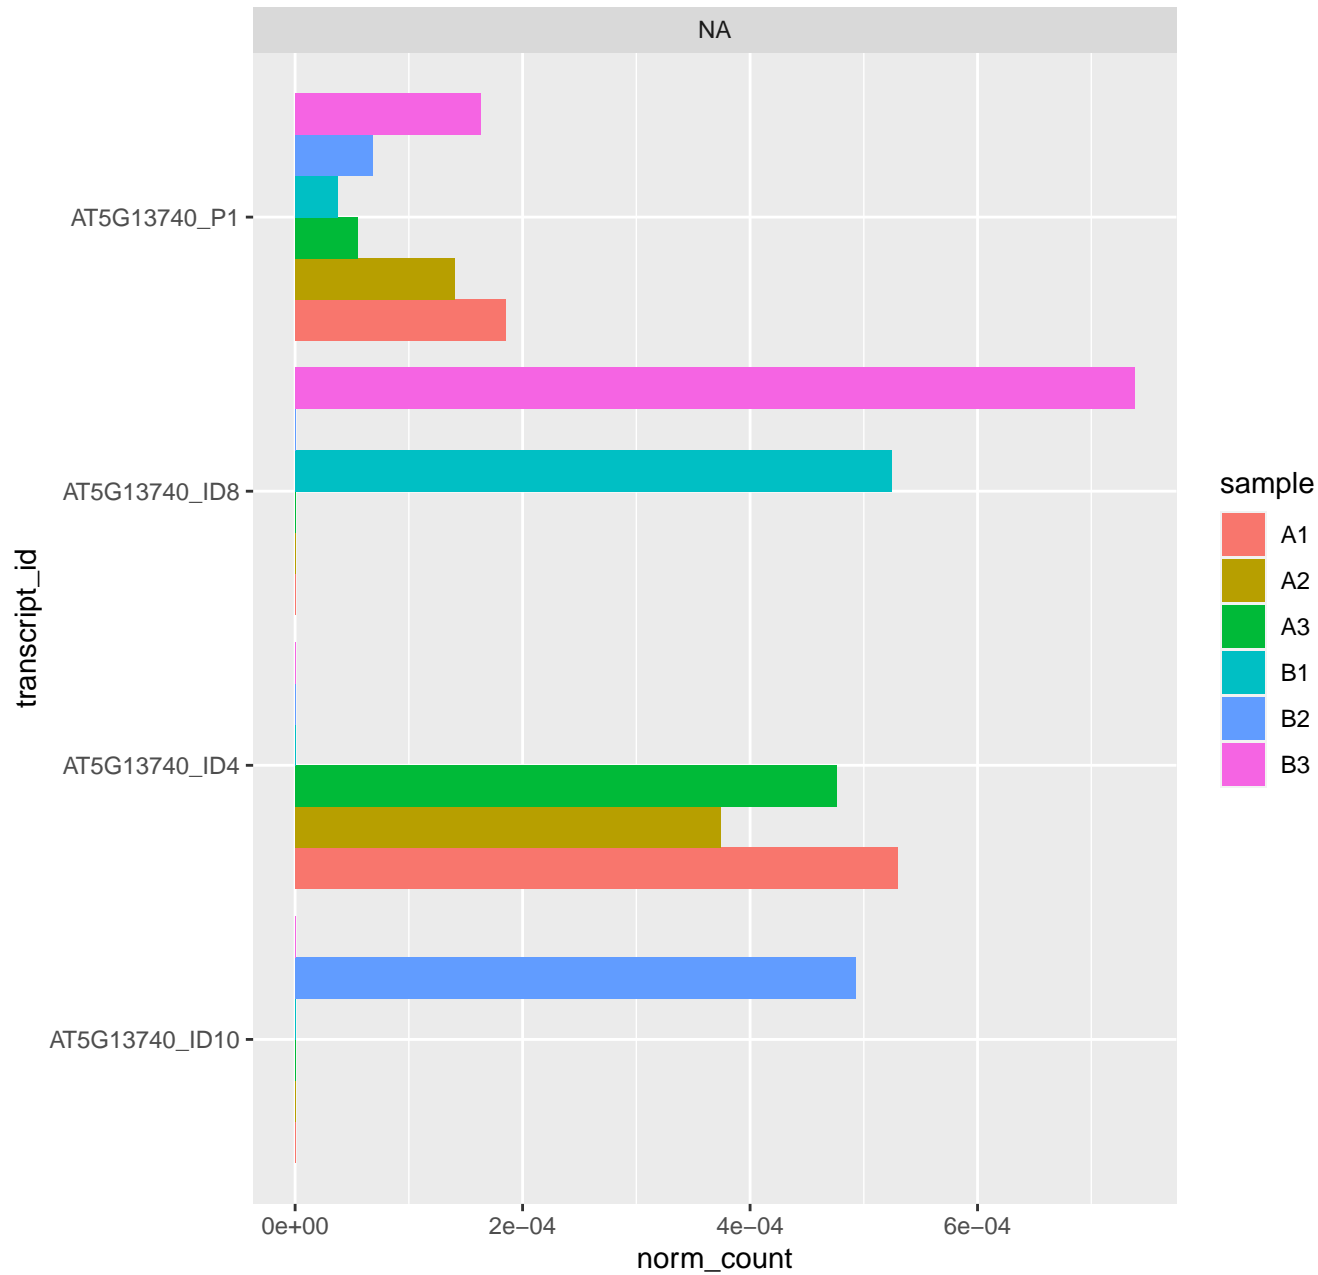

AT4G13530 : p\_value=1.1412045795763e-05

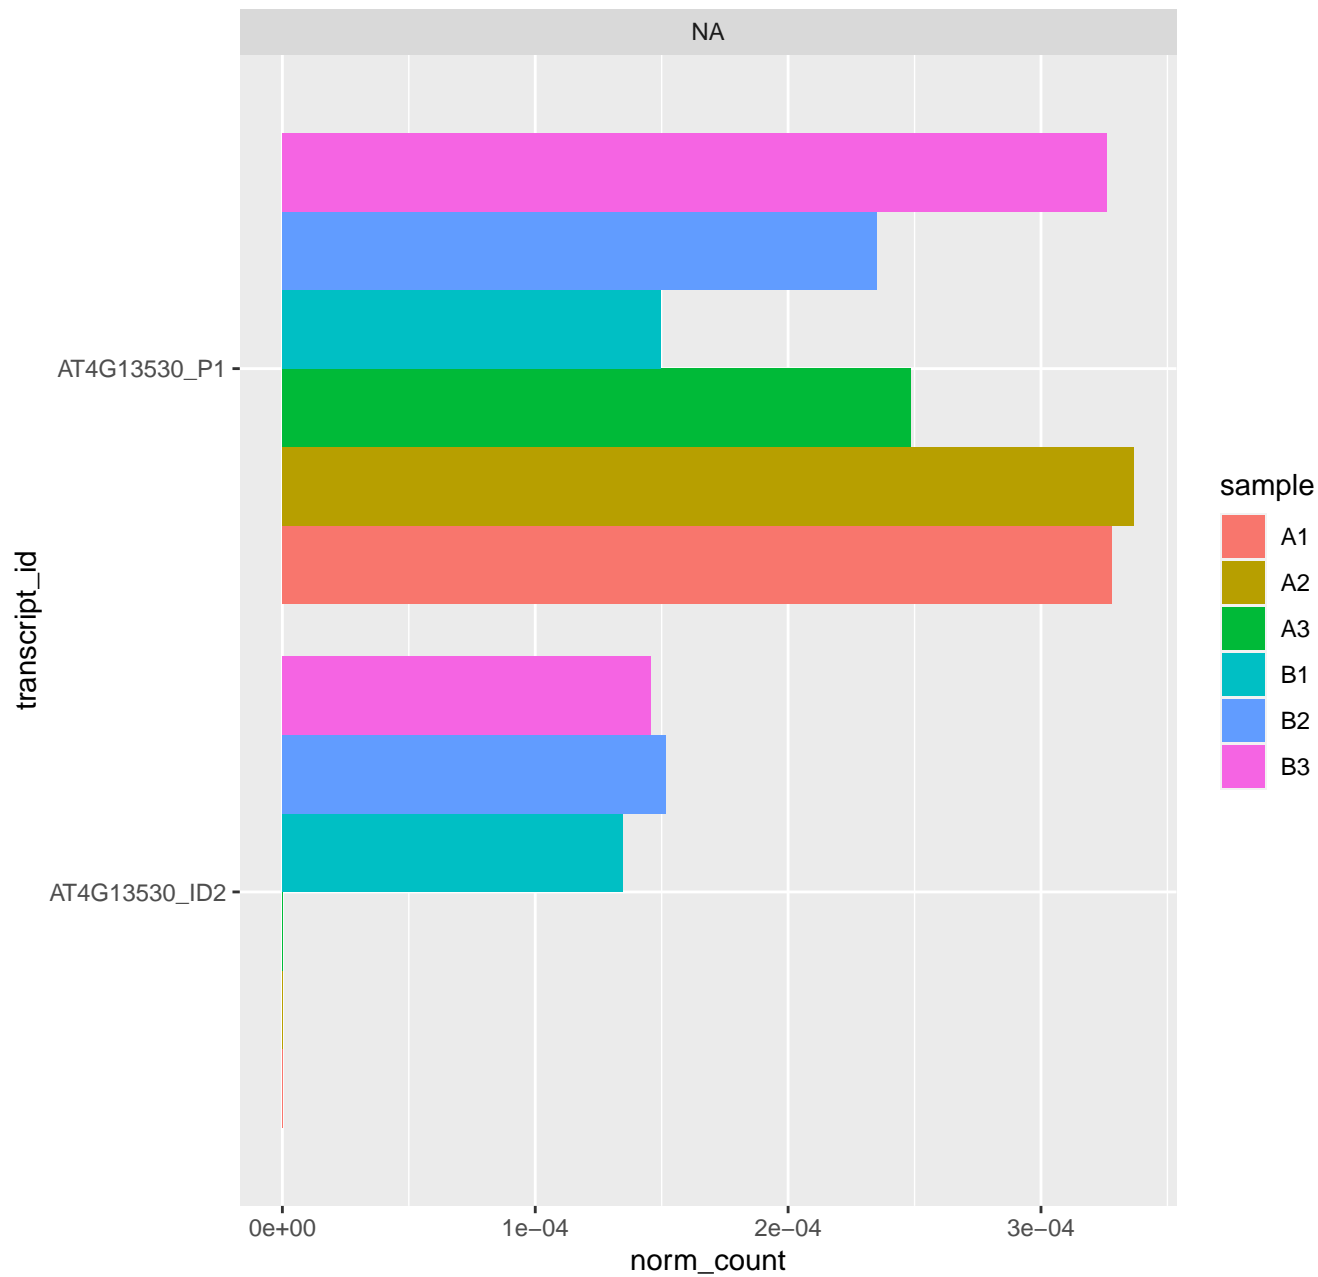

AT2G47070 : p\_value=0.00197654219026211

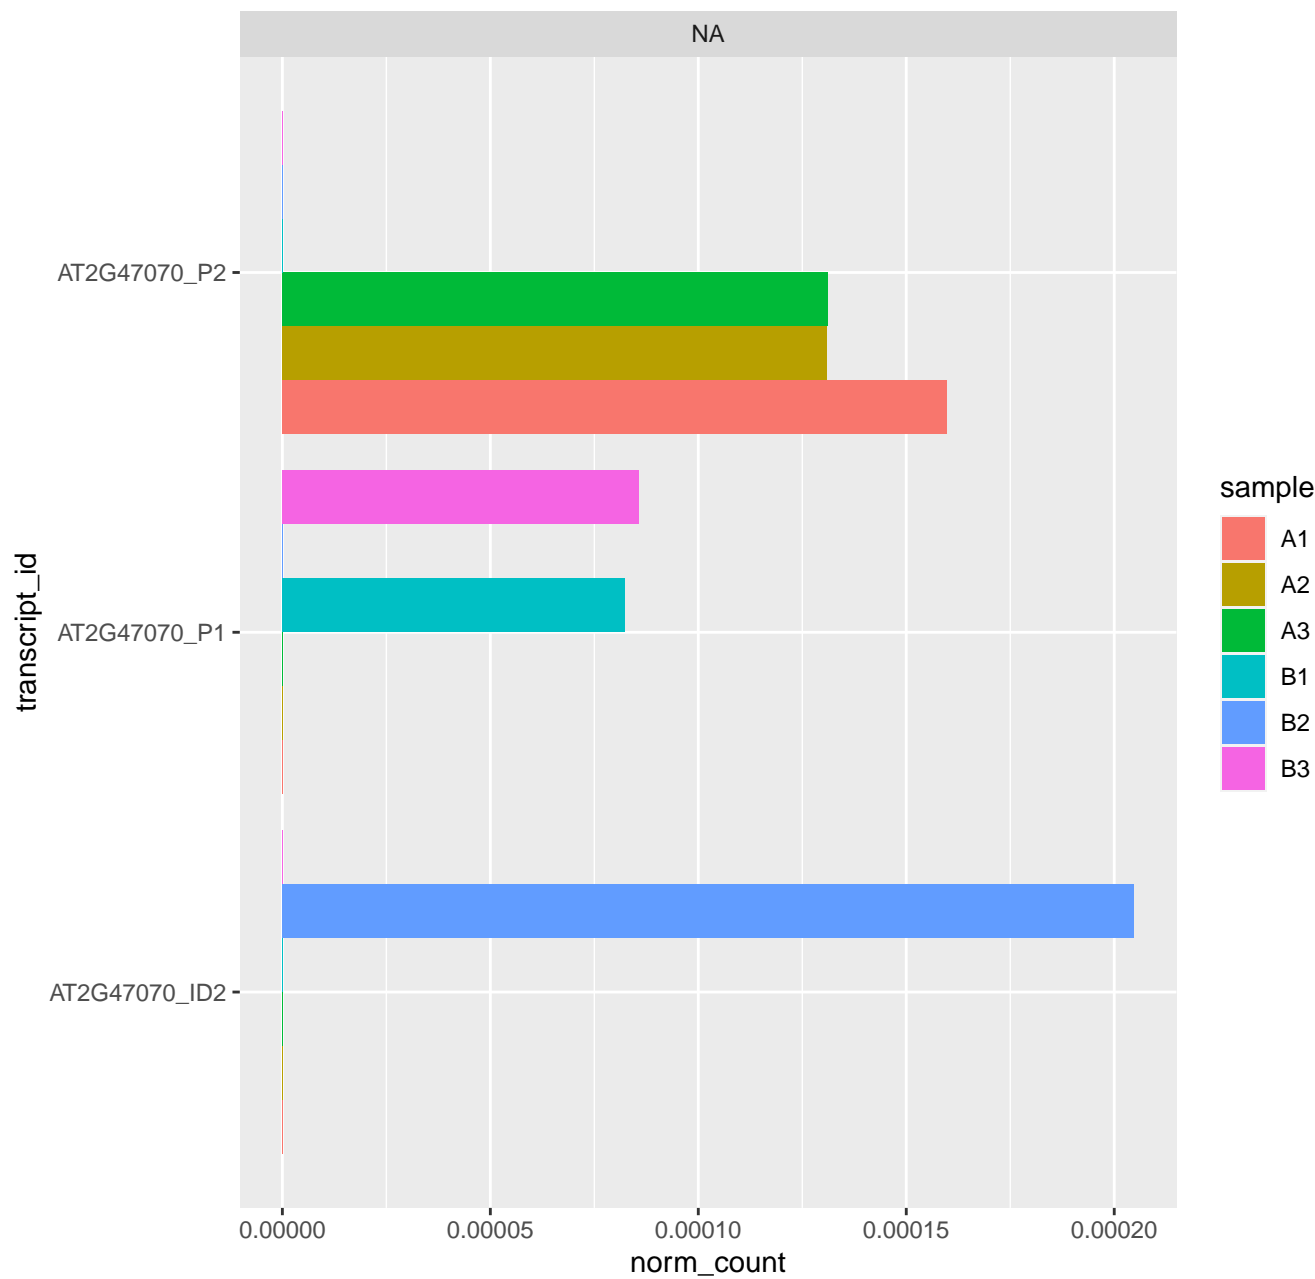

AT2G27720 : p\_value=0.00312679649122061

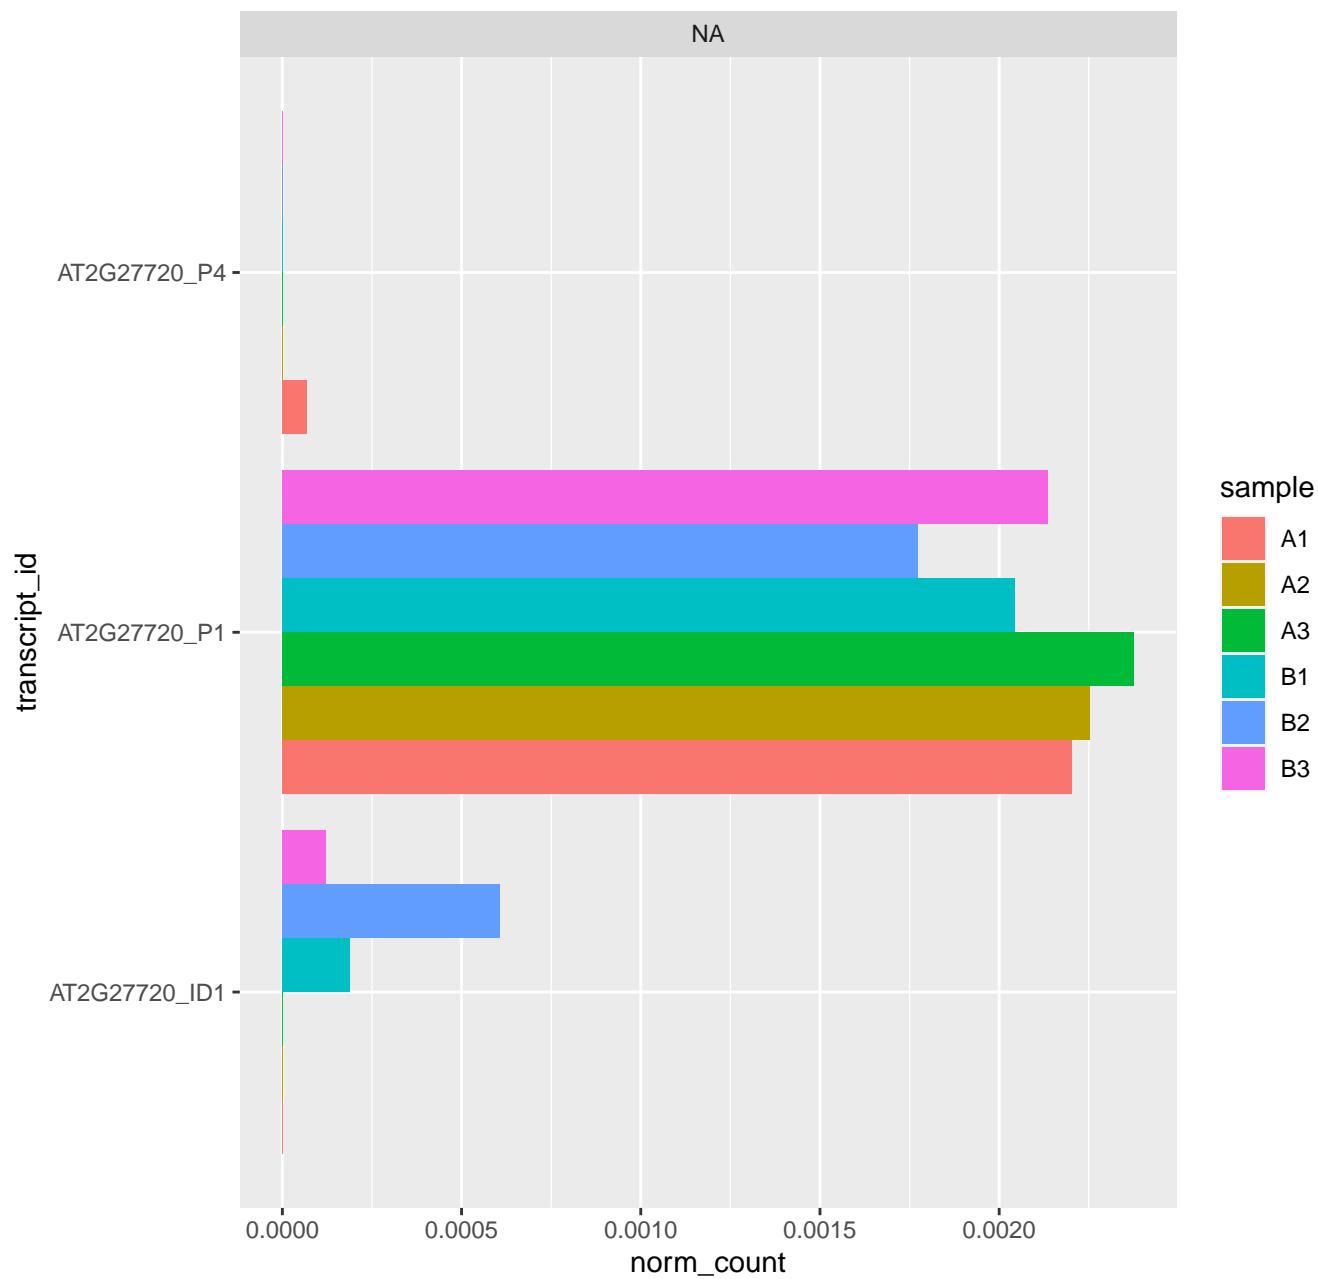

AT5G14060 : p\_value=0.00518184368877365

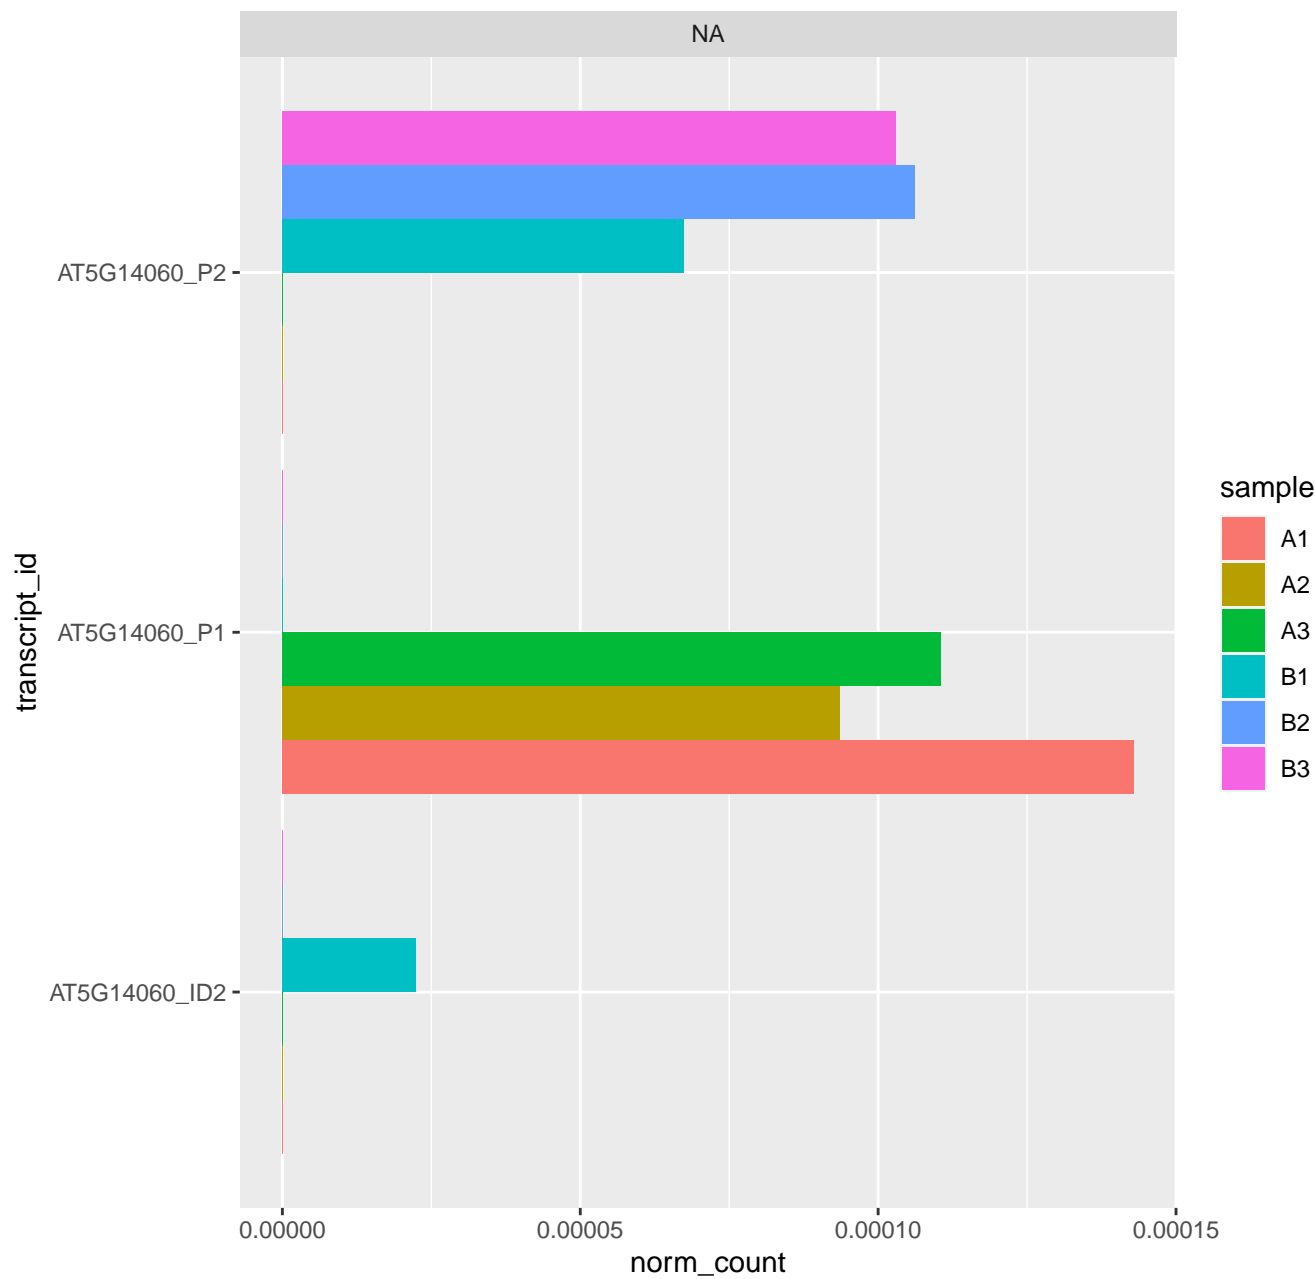

AT2G17220 : p\_value=0.00533645896917929

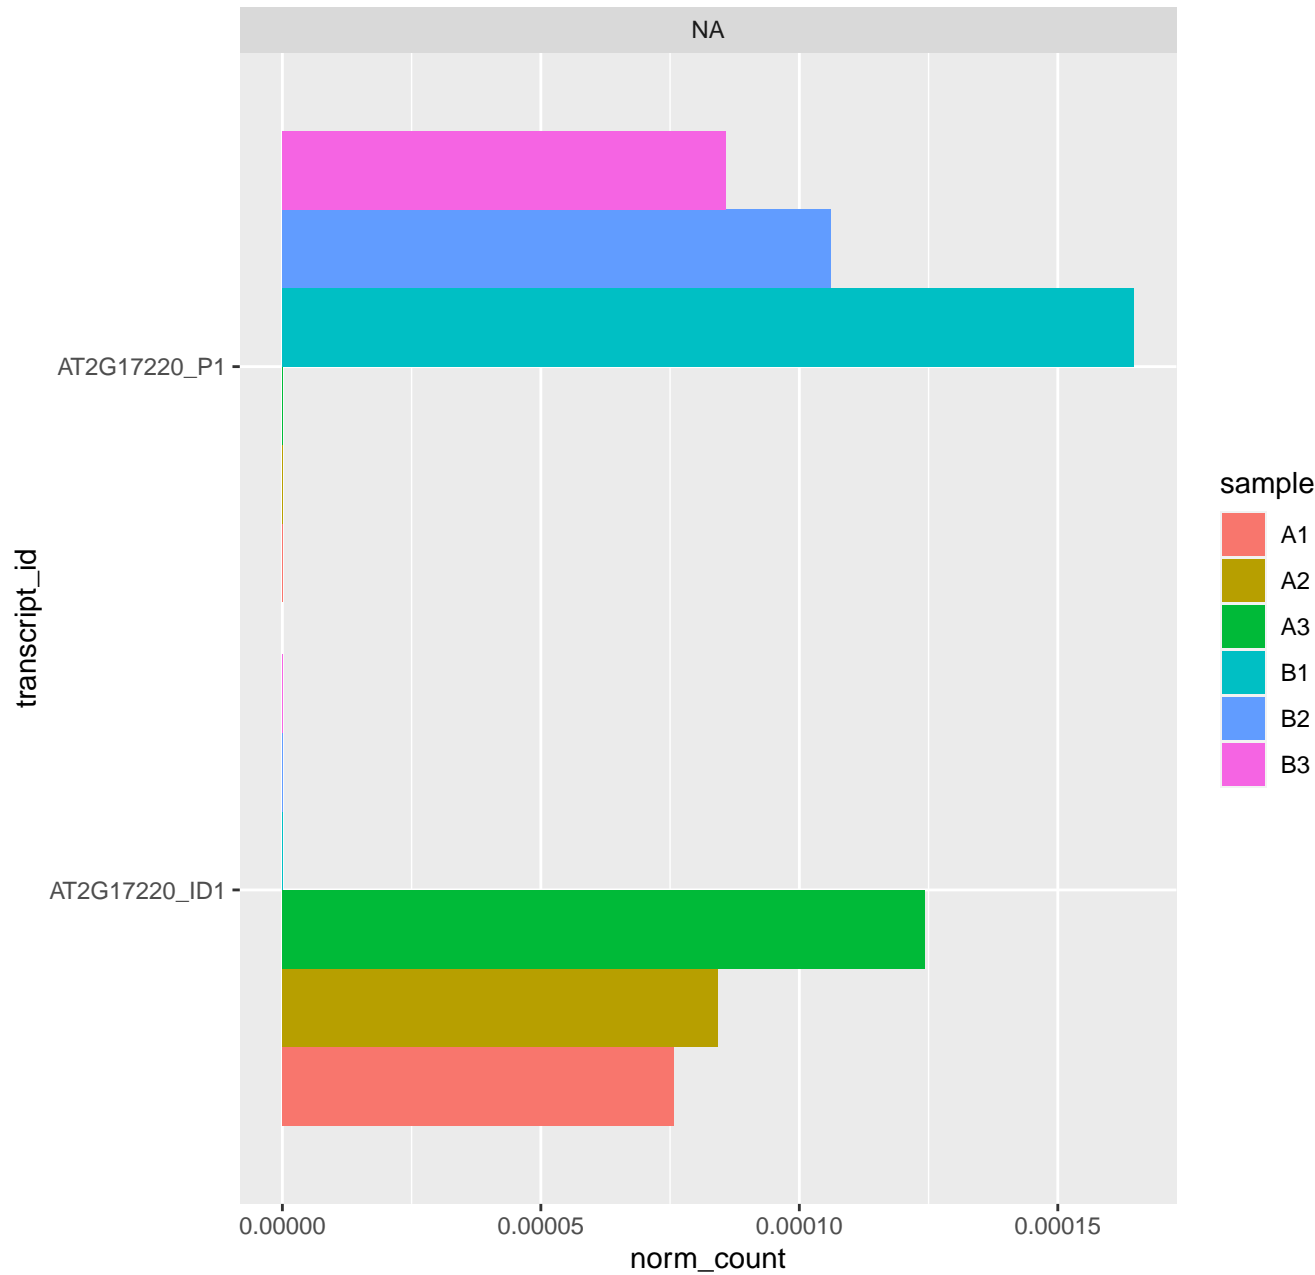

AT4G14210 : p\_value=0.00633011246765094

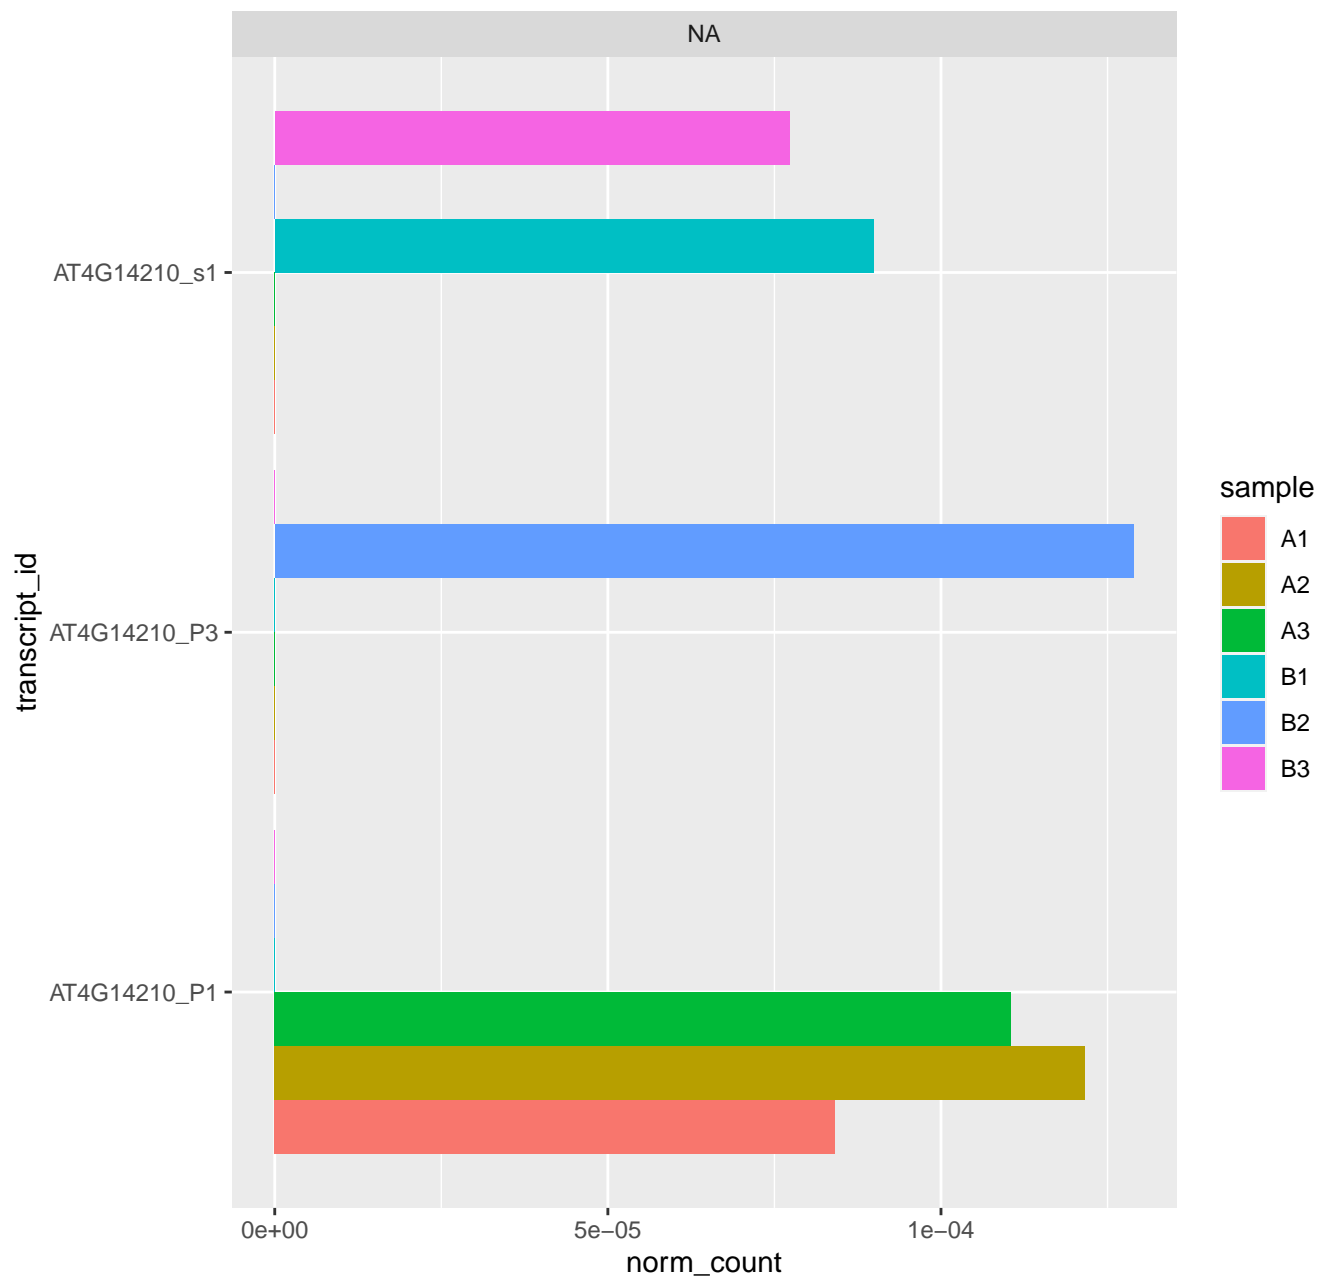



AT2G21330 : p\_value=0.0228475517597956

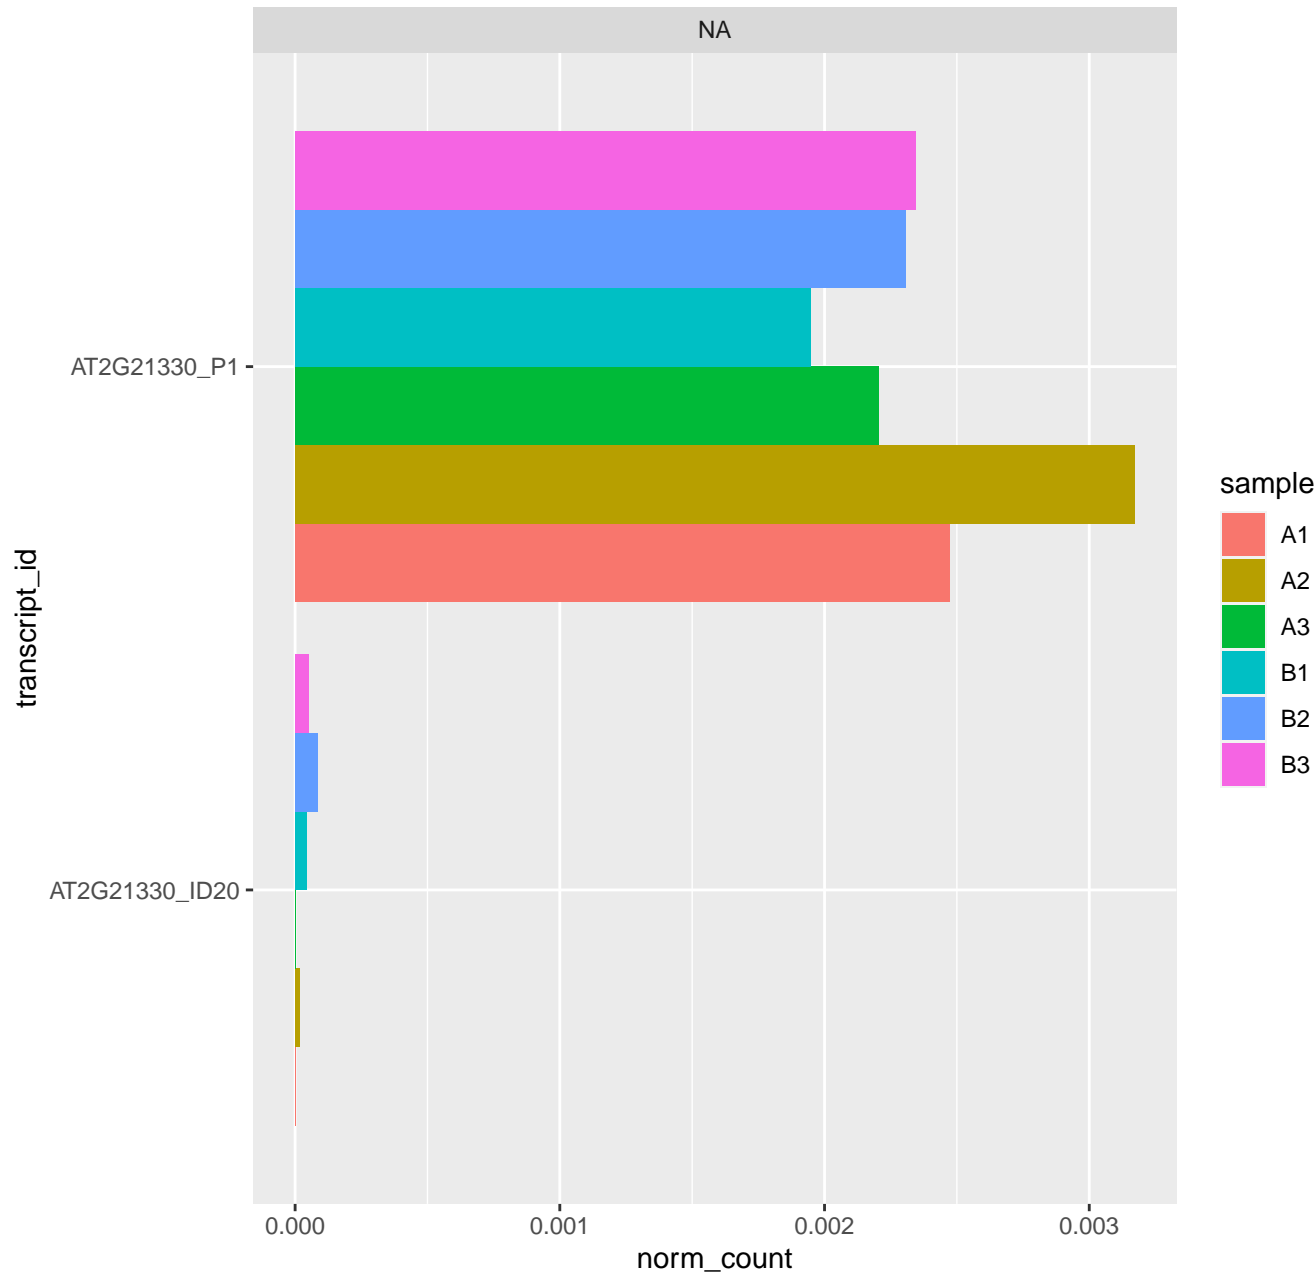

AT2G12400 : p\_value=0.0244448765210455

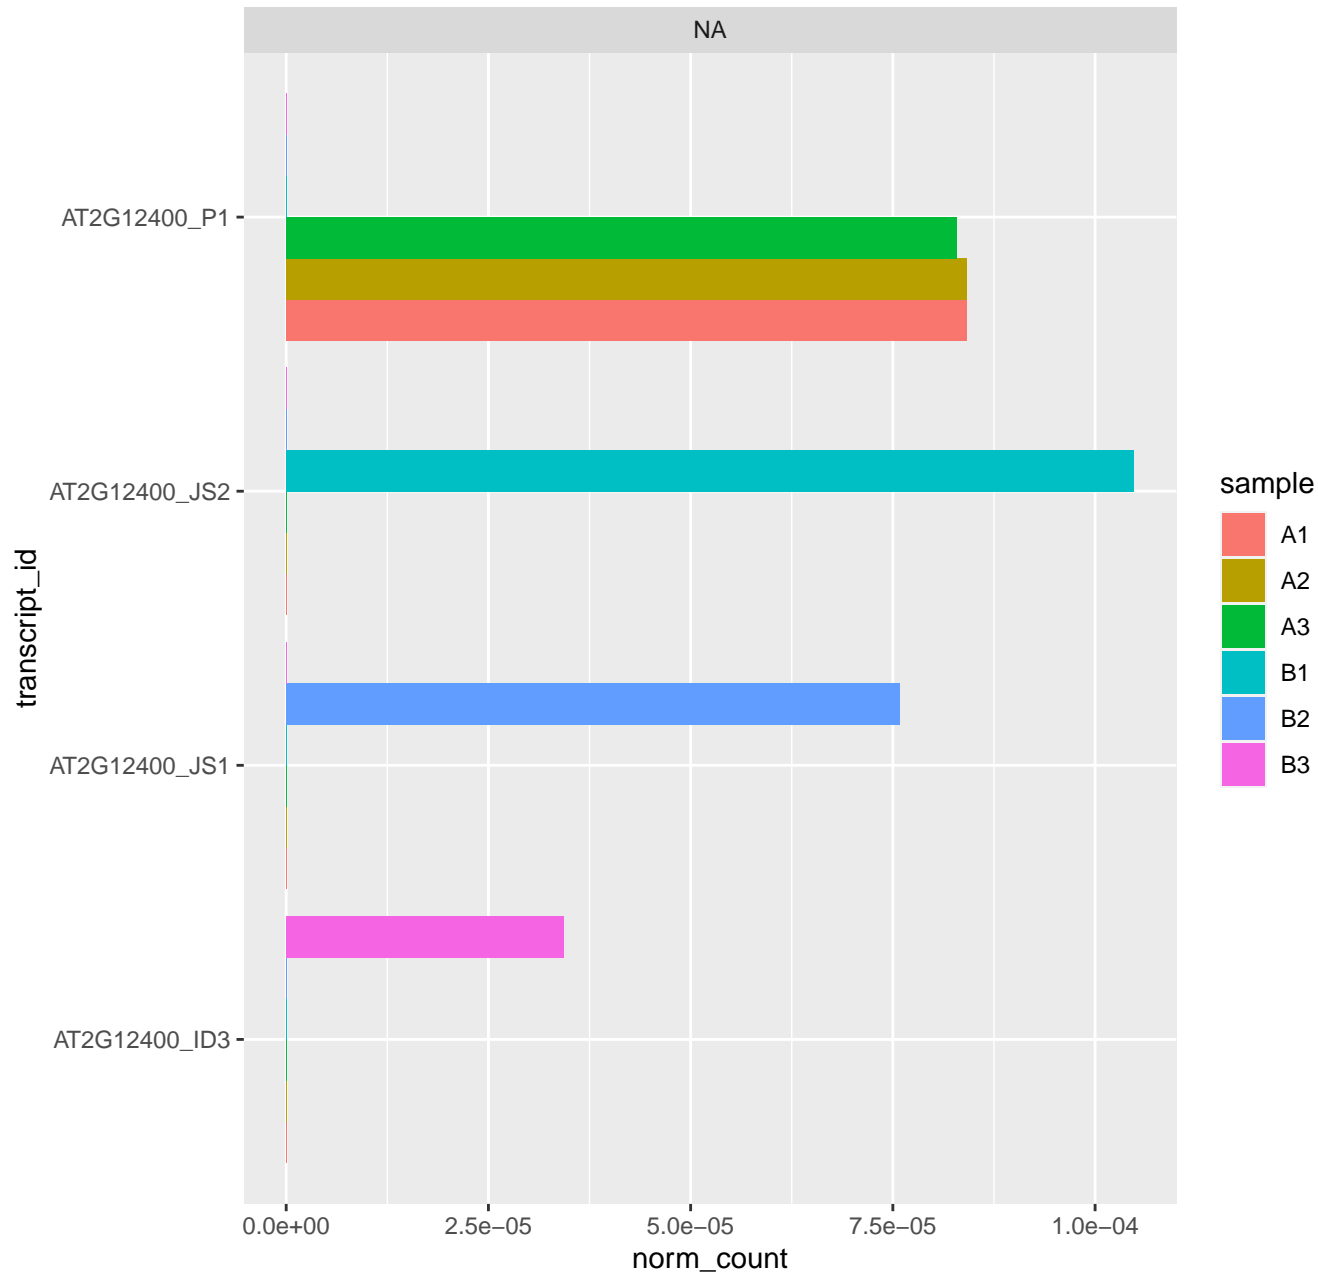

AT3G16400 : p\_value=0.039054275789409

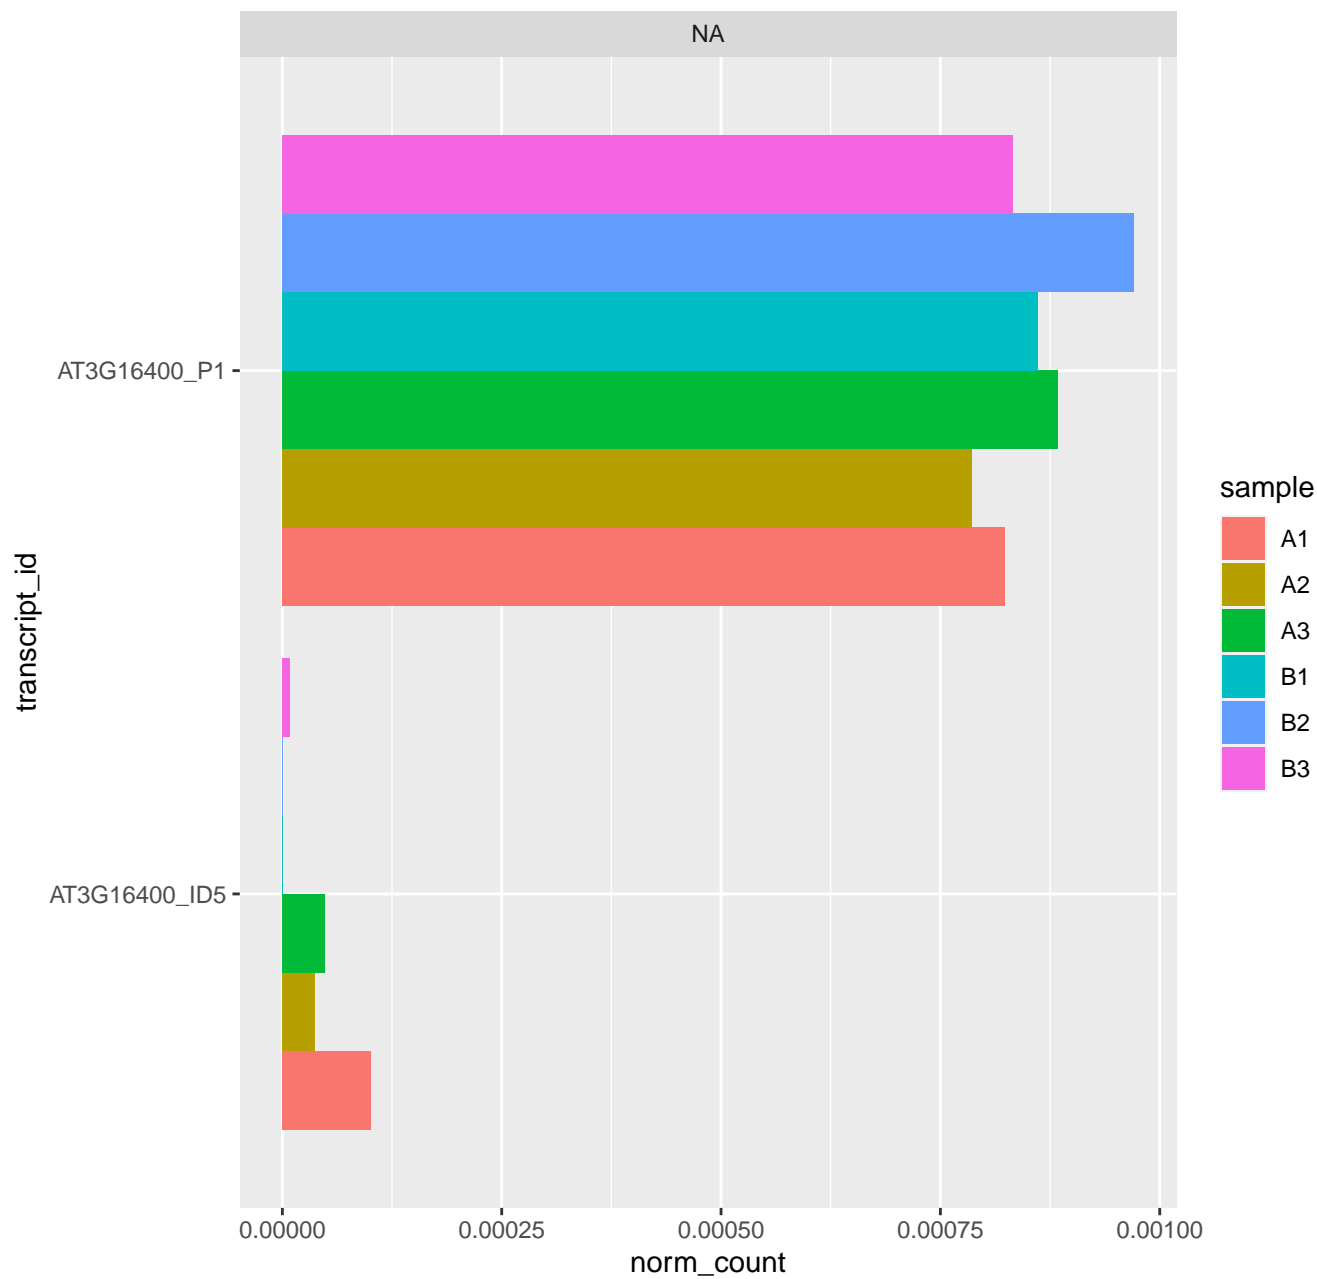

Supplement: s1 [file s1]
