# Supplementary material for: cDNA Transcriptome of Arabidopsis Reveals Various Defense Priming Induced by a Broad-Spectrum Biocontrol Agent Burkholderia sp. SSG
Source: MDPI journal article supplement (doi:10.3390/ijms23063151), 2022-03-15
Supplement: s1 [file s1]

6 hpt

Functional Categorization by annotation for : GO Molecular Function

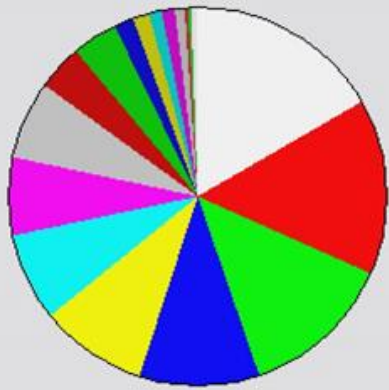

|                                                                     |
|---------------------------------------------------------------------|
| protein binding: 16.726% ( raw value = 47 )                         |
| transferase activity: 14.947% ( raw value = 42 )                    |
| catalytic activity: 13.167% ( raw value = 37 )                      |
| other binding: 10.32% ( raw value = 29 )                            |
| unknown molecular functions: 9.253% ( raw value = 26 )              |
| hydrolase activity: 7.473% ( raw value = 21 )                       |
| transporter activity: 6.762% ( raw value = 19 )                     |
| RNA binding: 6.762% ( raw value = 19 )                              |
| kinase activity: 3.915% ( raw value = 11 )                          |
| nucleotide binding: 3.915% ( raw value = 11 )                       |
| DNA binding: 1.779% ( raw value = 5 )                               |
| DNA-binding transcription factor activity: 1.423% ( raw value = 4 ) |
| structural molecule activity: 1.068% ( raw value = 3 )              |
| nucleic acid binding: 1.068% ( raw value = 3 )                      |
| enzyme regulator activity: 0.712% ( raw value = 2 )                 |
| carbohydrate binding: 0.356% ( raw value = 1 )                      |
| chromatin binding: 0.356% ( raw value = 1 )                         |

24 hpt

Functional Categorization by annotation for : GO Molecular Function

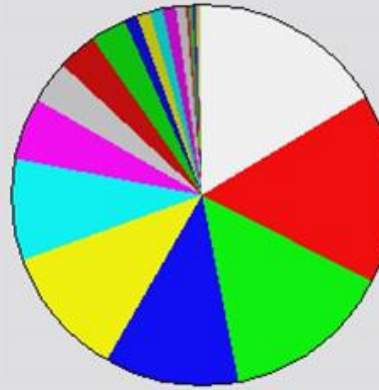

|                                                                     |
|---------------------------------------------------------------------|
| transferase activity: 16.357% ( raw value = 44 )                    |
| catalytic activity: 15.985% ( raw value = 43 )                      |
| other binding: 14.498% ( raw value = 39 )                           |
| hydrolase activity: 11.524% ( raw value = 31 )                      |
| protein binding: 11.152% ( raw value = 30 )                         |
| unknown molecular functions: 8.55% ( raw value = 23 )               |
| nucleotide binding: 5.204% ( raw value = 14 )                       |
| kinase activity: 3.717% ( raw value = 10 )                          |
| RNA binding: 3.346% ( raw value = 9 )                               |
| DNA binding: 2.974% ( raw value = 8 )                               |
| lipid binding: 1.115% ( raw value = 3 )                             |
| chromatin binding: 1.115% ( raw value = 3 )                         |
| carbohydrate binding: 1.115% ( raw value = 3 )                      |
| transporter activity: 1.115% ( raw value = 3 )                      |
| DNA-binding transcription factor activity: 0.743% ( raw value = 2 ) |
| enzyme regulator activity: 0.372% ( raw value = 1 )                 |
| signaling receptor activity: 0.372% ( raw value = 1 )               |
| nucleic acid binding: 0.372% ( raw value = 1 )                      |
| other molecular functions: 0.372% ( raw value = 1 )                 |
