# Supplementary material for: cDNA Transcriptome of Arabidopsis Reveals Various Defense Priming Induced by a Broad-Spectrum Biocontrol Agent Burkholderia sp. SSG
Source: MDPI journal article supplement (doi:10.3390/ijms23063151), 2022-03-15
Supplement: s1 [file s1]

|                                     |                                                               |                                        |                         |
|-------------------------------------|---------------------------------------------------------------|----------------------------------------|-------------------------|
| response to high<br>light intensity | response to light intensity                                   | cellular response to stress            | protein folding         |
| response to heat                    | <b>response to light intensity</b><br>response to cadmium ion | response to reactive<br>oxygen species | transmembrane transport |
| response to<br>inorganic substance  | response to metal ion                                         | response to desiccation                | chemical homeostasis    |
